# Supplementary material for: Teleost swim bladder, an ancient air-filled organ that elicits mucosal immune responses
Source: PubMed Central journal article supplement (PMC8979957; doi:10.1038/s41421-022-00393-3), 2022-04-05
Supplement: 41421_2022_393_MOESM1_ESM.pdf [file 41421_2022_393_MOESM1_ESM.pdf]

## 21 **Supplementary Methods**

22 **Cell culture and virus titration.** The IHNV was propagated and titrated in epithelioma  
23 papulosum cyprini (EPC) cells as previously reported<sup>1</sup>. Briefly, EPC cells were maintained in  
24 Minimum Essential Medium with Earl's salts (MEM, Gibco) supplemented with 10% fetal  
25 bovine serum (FBS, Gibco), 100 µg/mL streptomycin, and 100 U/mL penicillin (Gibco) with 5%  
26 CO<sub>2</sub> at 28 °C. The cell density was monitored until it reached 70-90% confluence in a T-75 flask  
27 (Corning) prior to viral infection. 10 µL of IHNV ( $1 \times 10^7$  TCID<sub>50</sub>) was inoculated to these cells  
28 in 12 mL culture medium and incubated at 18 °C for 2 hours. Thereafter, the media was replaced  
29 with 12 mL of 5% FBS/MEM. When extensive cytopathic effects (CPEs) were observed, the  
30 infected cells and medium were submitted to three cycles of freezing and thawing, followed by a  
31 gradient centrifugation (400 g for 10 min, 3,000 g for 10 min, and 10,000 g for 10 min) at 4 °C.  
32 The supernatant containing IHNV was filtered with a 0.22 µm PES membrane filtration  
33 (Millipore) to remove cell debris and bacteria, and titrated by the Median Tissue Culture  
34 Infectious Dose (TCID<sub>50</sub>) assay on EPC cells following the methodology reported by Reed and  
35 Muench<sup>2</sup>. Briefly, IHNV suspension was 10-fold serially diluted in MEM, and 100 µL of each  
36 serial dilution was inoculated into EPC cells in 96-well plate ( $1 \times 10^4$  cells per well). The plates  
37 were then placed in a 5% CO<sub>2</sub> cell incubator (Thermo) at 18 °C for 2 hours and replaced with 5%  
38 FBS/MEM. At 7 days post inoculation, the cells were inspected for signs of CPE via optical  
39 microscopy.

40 **Immersion infection of fish with IHNV and sample collection.** The fish were exposed to  $2 \times$   
41  $10^4$  TCID<sub>50</sub> IHNV per mL of water by immersion, and the mortality was recorded for 30 d. Two  
42 types of challenges with IHNV were performed to generate two groups of fish. For the first  
43 group, fish were exposed only once to the virus and then the SB tissue was collected at 1, 4, 7,  
44 and 14 DPI for the detection of viral load and pathological changes after fish were euthanized  
45 with an overdose of tricaine methanesulfonate (MS-222, Sigma). For the second group, fish  
46 surviving from the primary infection were challenged a second and a third time with the same  
47 dose of IHNV at 30 and 60 DPI, respectively. Thereafter, samples were collected at 75 DPI  
48 survivor fish (75DPI-S fish). Mock-infected (uninfected) fish were immersed with the same  
49 amount of culture medium from uninfected EPC cells as the control group.

50 **Isolation of HK and SB leukocytes.** To obtain leukocytes from HK and SB, the collected  
51 tissues were pressed through a 100- $\mu$ m cell strainer (BD Biosciences) and suspended in a  
52 Dulbecco's modified eagle medium (DMEM, Thermo) supplemented with 1% FBS (Gibco) and  
53 1% penicillin-streptomycin (Thermo). The cell suspensions from HK and SB were thereafter  
54 washed with the DMEM twice and were stored on ice until further use.

55 **Flow cytometry analysis.** Percentages of IgT<sup>+</sup> and IgM<sup>+</sup> B-cells in leukocytes of HK and SB  
56 and coating of Igs on SB microbiota were analyzed via flow cytometry as we previous  
57 described<sup>3</sup>. Briefly, the isolated leukocyte suspensions from the HK and SB were stained with  
58 mouse anti-trout IgT (clone 41.8; mouse IgG2b isotype; 1  $\mu$ g/mL) and mouse anti-trout IgM  
59 (clone 1.14; mouse IgG1 isotype; 1  $\mu$ g/mL) mAbs. Stained cells were detected with APC-  
60 conjugated goat anti-mouse IgG2b and PE-conjugated goat anti-mouse IgG1 (1  $\mu$ g/mL each, BD  
61 Biosciences) pAbs. To detect the coating of Igs on SB microbiota, the bacteria suspension from  
62 SB mucus was stained with mouse anti-trout IgT, anti-trout IgM and anti-trout IgD (mouse IgG1  
63 isotype) mAbs or their respective isotype controls (1  $\mu$ g/mL), followed by a secondary staining  
64 with Alexa Fluor 488-conjugated goat anti-mouse IgG2b (for IgT detection, BD Biosciences) or  
65 Alexa Fluor 488-conjugated goat anti-mouse IgG1 (for IgM or IgD detection, BD Biosciences)  
66 antibodies, respectively. BacLight Red bacterial stain (Invitrogen) was used to discriminate  
67 bacteria from debris following the manufacturer's instructions. The analysis of stained  
68 leukocytes or bacteria was performed with a CytoFLEX flow cytometer (Beckman Coulter) and  
69 FlowJo software (FlowJo, LLC).

70 **Histology, light microscopy, and immunofluorescence microscopy studies.** The collected SB  
71 tissues were fixed in 4% neutral buffered formalin, dehydrated in graded ethanol, embedded in  
72 paraffin, sectioned with microtome (Thermo) at a thickness of 5  $\mu$ m. Hematoxylin/eosin (H & E)  
73 stain and Alcian Blue-Periodic acid-schiff (AB-PAS) stain were performed as previously  
74 reported<sup>4</sup>. The detection of IgT<sup>+</sup> and IgM<sup>+</sup> B-cells in SB tissues was performed by  
75 immunofluorescence microscopy as we have described previously<sup>5</sup>. Briefly, the paraffin-section  
76 of SB was blocked by StartingBlock™ Blocking Buffer (Thermo) and then double-stained with  
77 rabbit anti-trout IgT pAb (Rabbit IgG isotype; 0.5  $\mu$ g/mL) and mouse anti-trout IgM mAb (IgG1  
78 isotype; 1  $\mu$ g/mL) overnight at 4 °C. After washing three times with PBS, B-cells were detected  
79 by Alexa Fluor 488-conjugated AffiniPure Goat anti-rabbit IgG (for IgT detection) and Cy3-

80 conjugated AffiniPure Goat anti-mouse IgG (for IgM detection) (Jackson ImmunoResearch  
81 Laboratories Inc) at 2.5 µg/mL each for 40 min at room temperature (RT). To study the  
82 colocalization of trout pIgR and IgT in SB mucosa, the paraffin-section of SB was first stained  
83 with rabbit anti-trout IgT pAb (0.5 µg/mL) overnight at 4 °C, followed by Cy3-conjugated  
84 AffiniPure goat anti-rabbit IgG (2.5 µg/mL; Jackson ImmunoResearch Laboratories Inc) for 40  
85 min at RT. After washing six times with PBS, the same paraffin-section was stained with the  
86 biotin-labeled anti-trout pIgR pAb (0.5 µg/mL) overnight at 4 °C, followed by the Alexa Fluor  
87 488-conjugated Streptavidin (Jackson ImmunoResearch Laboratories Inc) for 40 min at RT. For  
88 the detection of IHNV infected cells in the SB tissue, the paraffin-sections were stained with  
89 mouse anti-IHNV-*N* mAb (Mouse IgG for isotype; 1 µg/mL; BIO-X Diagnostics) at 4 °C  
90 overnight. As controls, the mouse IgG was used at the same concentration. After washing three  
91 times with PBS, Cy3-conjugated AffiniPure goat anti-mouse IgG pAb (3 µg/mL) was added and  
92 incubated at RT for 40 min. All sections were stained with DAPI (4', 6-diamidino-2  
93 phenylindole; 1 µg/mL; Invitrogen) for 8 min before mounting. For visualization of Ig coating on  
94 SB bacteria, the bacteria were first double-stained with rabbit anti-trout IgT and mouse anti-trout  
95 IgM (1 µg/mL each), or isotype controls (the rabbit IgG and the mouse-IgG1, 1 µg/mL each) at  
96 4 °C for 2 h with continuous agitation. After washing three times with PBS, the secondary  
97 antibodies Alexa Fluor 488-conjugated AffiniPure Goat anti-rabbit IgG or Cy3-conjugated  
98 AffiniPure Goat anti-mouse IgG (Jackson ImmunoResearch Laboratories Inc.) were each added  
99 (2.5 µg/mL) and incubated for 30 min at 4 °C. After washing three times with PBS, biotin-  
100 labeled mouse anti-IgD antibody (1 µg/mL) was added and incubated at 4 °C for 2 h. SB bacteria  
101 were thereafter washed three times and Alexa Fluor 647-conjugated Streptavidin (Jackson  
102 ImmunoResearch Laboratories Inc.) was added (5 µg/mL) and incubated at 4 °C for 30 min.  
103 Before mounting, bacteria were stained with a mixed solution of DAPI and Hoechst 33342 dye  
104 (5 µg/mL; Molecular Probes). Stained bacteria were cytopinned on glass slides and mounted  
105 with fluorescent microscopy mounting solution. Images were captured using an Olympus BX53  
106 fluorescence microscope and analyzed with the iVision-Mac scientific imaging processing  
107 software (Olympus).

108 **SDS-PAGE and western blot analyses.** The collected serum (1 µL) and SB mucus (40 µL)  
109 samples were kept in Laemmli sample buffer (Bio-Rad) and separated via 4-15% SDS-PAGE  
110 Ready Gel (Bio-Rad) under non-reducing and/or reducing conditions. Subsequently, the gels

111 were transferred onto Sequi-Blot polyvinylidene fluoride (PVDF) membranes (Bio-Rad) and  
112 blocked with 8% skim milk in PBS (pH 7.2) at RT for 2 h. The membranes were incubated with  
113 rabbit anti-trout IgT pAb, mouse anti-trout IgM or biotinylated mouse anti-trout IgD mAbs,  
114 followed by incubation with HRP-conjugated anti-rabbit IgG (for IgT detection, Abcam), anti-  
115 mouse IgG (for IgM detection, GE Healthcare) and Streptavidin (for IgD detection, Thermo),  
116 respectively<sup>5</sup>. Immunoreactive bands were visualized using the enhanced chemiluminescent  
117 reagent (Advansta) and scanned by an Amersham Imager 600 imaging system (GE Healthcare).  
118 For quantitative analysis of IgT, IgM, and IgD in serum and SB mucus, the signal strength of  
119 each band was determined by using ImageQuant TL software (GE Healthcare). Thereafter, the  
120 concentration of IgT, IgM and IgD were determined by plotting the obtained signal strength  
121 values on a standard curve generated for each blot using known amounts of purified trout IgT,  
122 IgM and IgD, respectively, as previously described by us<sup>5</sup>. Original images of the western blot  
123 analyses are shown in Supplementary Fig. S11.

124 **Gel filtration.** Gel filtration was conducted to analyze the monomeric or polymeric state of Igs  
125 in trout SB mucus using a Superdex-200 FPLC column (GE Healthcare) as previously described  
126 by us<sup>5</sup>. Western blot analysis was performed to identify IgM, IgD, and IgT in the eluted fractions  
127 using IgM-, IgD-, and IgT-specific antibodies.

128 **Co-immunoprecipitation studies.** To evaluate whether the polymeric IgT present in the trout  
129 SB was associated with trout secretory component (tSC) co-immunoprecipitation studies were  
130 performed to detect the association of trout pIgR (i.e., tSC) to IgT in the SB, as described in our  
131 previous study<sup>3</sup>. We performed co-immunoprecipitation analysis using rabbit anti-trout IgT pAb  
132 with the goal to co-immunoprecipitate tSC. To this end, 10 µg of anti-trout IgT pAb were  
133 incubated with 300 µL of trout SB mucus. As control for these studies, the same amount of rabbit  
134 IgG (purified from the pre-bleed serum of the rabbit) were used as negative controls. After  
135 overnight incubation at 4 °C, 20 µL of Dynabeads protein G (Invitrogen) prepared previously  
136 was added into each reaction mixture and incubated for 1 h at 4 °C according to the  
137 manufacturer's instructions. Thereafter, the beads were washed five times with PBS, and then,  
138 the subsequently bound proteins were eluted in 2 × Laemmli Sample Buffer (Bio-Rad). The  
139 eluted material was resolved on 4-15% SDS-PAGE Ready Gel under reducing (for tSC  
140 detection) or non-reducing (for IgT detection) conditions. Western blot was performed with

141 rabbit anti-trout pIgR and rabbit anti-trout IgT pAbs as described above.

142 **RNA isolation and qPCR analysis.** Total RNA from each sample was extracted using the  
143 TRIzol reagent (Invitrogen) according to the manufacturer's protocols and resuspended in  
144 RNase-free H<sub>2</sub>O. The concentration and integrity of RNA were respectively detected by  
145 spectrophotometry (Implen NanoPhotometer NP 80 Touch, Germany) and agarose gel  
146 electrophoresis. Thereafter, equivalent amounts of the total RNA (1 µg) were reverse transcribed  
147 using Hifair III 1st Strand cDNA Synthesis SuperMix for qPCR (gDNA digester plus)  
148 (YEASEN). The synthesized cDNA was diluted four times and then used as a template for qPCR  
149 analysis. qPCR was conducted using the MonAmp™ SYBR Green qPCR Mix (Monad)  
150 following the manufacturer's instructions. Viral loads were determined by constructing an IHNV  
151 plasmid standard curve, average values from duplicates of each gene in the samples were  
152 extrapolated using the standard curve to calculate the IHNV copy numbers. Supplementary Table  
153 1 summarizes the primers used for qPCR analysis.

154 **Viability of infected EPC cells and expression of IHNV in cells.** The potential effects of IHNV  
155 on EPC cell viability were analyzed by the alamarBlue assay using alamarBlue™ Cell Viability  
156 Reagent (Invitrogen) according to the manufacturer's instructions. Briefly, 1/10th volume of cell  
157 viability reagent was directly added to the medium of IHNV-infected EPC cells in 96-well plates  
158 and incubated for 4 h at 18 °C in a cell culture incubator. The absorbance of alamarBlue was  
159 measured at a wavelength of 570 nm using a SpectroStar Omega absorbance microplate reader  
160 (BMG LabTech). The background absorbance was measured at 600 nm and subtracted. The  
161 percent reduction of alamarBlue was calculated using the manufacturer's instructions<sup>6,7</sup>.  
162 Detection of IHNV protein *N* in infected EPC cells was performed by immunofluorescence and  
163 western blot analyses with mouse anti-IHNV-*N* mAb (Bio-X Diagnostics). For the  
164 immunofluorescence microscopy of IHNV in EPC cells, the infected cells were fixed in 4%  
165 neutral buffered formalin and stained with mouse anti-IHNV-*N* mAb (1 µg/mL) at 4 °C  
166 overnight and then stained with Cy3-conjugated AffiniPure goat anti-mouse IgG pAb (3 µg/mL)  
167 at room temperature for 40 min. Images were captured using the inverted microscope (Leica). To  
168 detect IHNV by western blotting, the infected cells were collected and lysed with Cell Lysis  
169 Buffer (Beyotime) at a ratio of  $2 \times 10^4$  cells to 100 µL of lysis buffer. The cell lysate was  
170 centrifuged at 12,000 g for 10 min at 4 °C to remove particle debris. Thereafter, 20 µL of the

171 resulting supernatant was mixed with 20  $\mu$ L 2  $\times$  Laemmli sample buffer, proteins were separated  
172 via 4-15% SDS-PAGE Ready Gel under reducing conditions, and detected by mouse anti-IHNV-  
173 N mAb (0.2  $\mu$ g/mL) for western blot.

174 **RNA-Seq library construction and bioinformatic analyses.** For the construction of RNA-seq  
175 libraries, twelve SB tissue samples (including control and IHNV infection groups at 4 and 21  
176 DPI) were obtained and total mRNA was extracted using the TRIzol reagent and resuspended in  
177 RNase-free H<sub>2</sub>O. Thereafter, mRNA was purified from the total RNA using poly-T oligo-  
178 attached magnetic beads (Thermo) following the manufacturer's instructions. Short mRNA  
179 fragments were reverse transcribed into first-strand cDNA using random hexamer (Thermo) and  
180 Superscript II reverse transcriptase (Thermo), followed by the synthesis of second-strand cDNA  
181 using RNaseH (QIAGEN) and DNA polymerase I (QIAGEN). The 3' ends of the DNA  
182 fragments were adenylated and a unique identifier (UID) was added at the 5' ends before ligating  
183 them to Illumina paired-end sequencing adaptors. PCR amplification was conducted using the  
184 Phusion High-Fidelity Master Mix Phusion High-Fidelity Master Mix (Thermo) and Illumina  
185 primers Phusion High-Fidelity Master Mix (Thermo) according to the manufacturer's  
186 instructions. All RNA-seq data were generated by Illumina paired-end sequencing with 150 bp  
187 read lengths. Reads were mapped to the *Oncorhynchus mykiss* genome using STAR with default  
188 parameters<sup>8</sup>. The mapped reads were analyzed via feature counts<sup>9</sup>. Differential expression was  
189 estimated with the edgeR package<sup>10</sup>. Genes with low expression levels (count-per-million <1 in  
190 three or more samples) were excluded from downstream analyses. The resulting genes were  
191 considered differentially expressed genes (DEGs) if the false discovery rate  $\leq 0.05$  and  $|\log_2(\text{fold-}$   
192  $\text{change})| \geq 1$ . To further understand the transcriptomic data, gene ontology (GO) enrichment  
193 analysis was conducted using KOBAS to determine the biological processes that were significantly  
194 dysregulated following IHNV infection<sup>11</sup>.

195 **Behavioral assay.** The behavioral assay of rainbow trout was performed as previously  
196 described<sup>12</sup>. Briefly, each fish was placed in a ~6.6 L glass tank (26 cm  $\times$  18 cm  $\times$  14 cm). The  
197 locomotor trajectory was monitored using a ZebraTower system (ViewPoint). Movements were  
198 recorded every 5 s over a 5 min period and raw data was transferred into behavioral parameters  
199 that were conducted by Zebrolab (Viewpoint).

200 **Tissue explants culture.** HK and SB were collected from the control and survivor fish, and the  
201 explants were cultured as previously described by us<sup>5</sup>. Briefly, tissues were submerged in 70%  
202 ethanol for 30 s to eliminate contaminating bacteria on the surface and then washed twice with  
203 PBS. Thereafter, tissues were placed in a 24-well plate and cultured with 200  $\mu$ L DMEM  
204 (Gibco), supplemented with 10% FBS, 100  $\mu$ g/mL streptomycin, and 100 U/mL penicillin, with  
205 5% CO<sub>2</sub> at 18 °C. After 7 days culture, supernatants were harvested, centrifuged, and stored at -  
206 80 °C for detection of IgM-, IgT-, and IgD-specific binding to IHNV.

207 **Proliferation of B-cells in the SB of trout.** Survivor and control fish (~10 g) were anaesthetized  
208 with MS-222 and intravenously injected with 200  $\mu$ g 5-ethynyl-2'-deoxyuridine (EdU,  
209 Invitrogen) in 100  $\mu$ L PBS. After 24 hours, SB tissues were obtained, and the proliferation of  
210 EdU<sup>+</sup> cells were detected by immunofluorescence microscopy and flow cytometry analyses as  
211 previously described by us<sup>5</sup>. After the staining of IgT<sup>+</sup> and IgM<sup>+</sup> B-cells described above, stained  
212 cells were fixed and EdU<sup>+</sup> cell detection was performed by Click-iT EdU Alexa Fluor 647  
213 Imaging Assay Kit (for imaging) and Click-iT EdU Alexa Fluor 488 Flow Cytometry Assay Kit  
214 (for flow cytometry) (Invitrogen) according to the manufacturer's instructions. For  
215 immunofluorescence analysis, cell nuclei were stained with DAPI (1  $\mu$ g/mL) before mounting  
216 with fluorescent microscopy mounting solution. The images were acquired and analysed by  
217 using BX53 fluorescence microscope (Olympus) and iVision-Mac scientific imaging processing  
218 software (Olympus). For flow cytometry analysis, cells were analysed with a CytoFLEX Flow  
219 Cytometer (Beckman Coulter) and FlowJo software (FlowJo, LLC).



220 **Supplementary References**

- 221 1. Liu, H., Liu, Y., Liu, S., Pang, D.W. & Xiao, G. Clathrin-mediated endocytosis in living host  
222 cells visualized through quantum dot labeling of infectious hematopoietic necrosis virus. *J.*  
223 *Virolog.* **85**, 6252-6262 (2011).
- 224 2. Reed, L.J. & Muench, H. A simple method of estimating fifty per cent endpoints. *Am. J.*  
225 *Epidemiol.* **27**, 493-497 (1938).
- 226 3. Yu, Y.Y. et al. Mucosal immunoglobulins protect the olfactory organ of teleost fish against  
227 parasitic infection. *PLoS. Pathog.* **14**, e1007251 (2018).
- 228 4. Crespo-Moral, M., García-Posadas, L., López-García, A. & Diebold, Y. Histological and  
229 immunohistochemical characterization of the porcine ocular surface. *PLoS One* **15**,  
230 e0227732 (2020).
- 231 5. Xu, Z. et al. Mucosal immunoglobulins at respiratory surfaces mark an ancient association  
232 that predates the emergence of tetrapods. *Nat. Commun.* **7**, 10728 (2016).
- 233 6. Pettit, R.K., Weber, C.A. & Pettit, G.R. Application of a high throughput Alamar blue  
234 biofilm susceptibility assay to *Staphylococcus aureus* biofilms. *Ann. Clin. Microbiol.*  
235 *Antimicrob.* **8**, 28 (2009).
- 236 7. Byth, H.A., McHunu, B.I., Dubery, I.A. & Bornman, L. Assessment of a simple, non-toxic  
237 Alamar blue cell survival assay to monitor tomato cell viability. *Phytochem. Anal.* **12**, 340-  
238 346 (2001).
- 239 8. Dobin, A. et al. STAR: ultrafast universal RNA-seq aligner. *Bioinformatics.* **29**, 15–21  
240 (2013).
- 241 9. Liao, Y., Smyth, G.K. & Shi, W. Feature Counts: an efficient general purpose program for  
242 assigning sequence reads to genomic features. *Bioinformatics.* **30**, 923–930 (2014).
- 243 10. Robinson, M.D., McCarthy, D.J. & Smyth, G.K. edgeR: a Bioconductor package for  
244 differential expression analysis of digital gene expression data. *Bioinformatics* **26**, 139–140  
245 (2010).
- 246 11. Wu, J., Mao, X., Cai, T., Luo, J. & Wei, L. KOBAS server: a web-based platform for  
247 automated annotation and pathway identification. *Nucleic Acids Res.* **34**, 720–724 (2006).
- 248 12. Shi, C. et al. Hyperandrogenism in POMCa-deficient zebrafish enhances somatic growth  
249 without increasing adiposity. *J. Mol. Cell Biol.* **12**, 291–304 (2020).

250

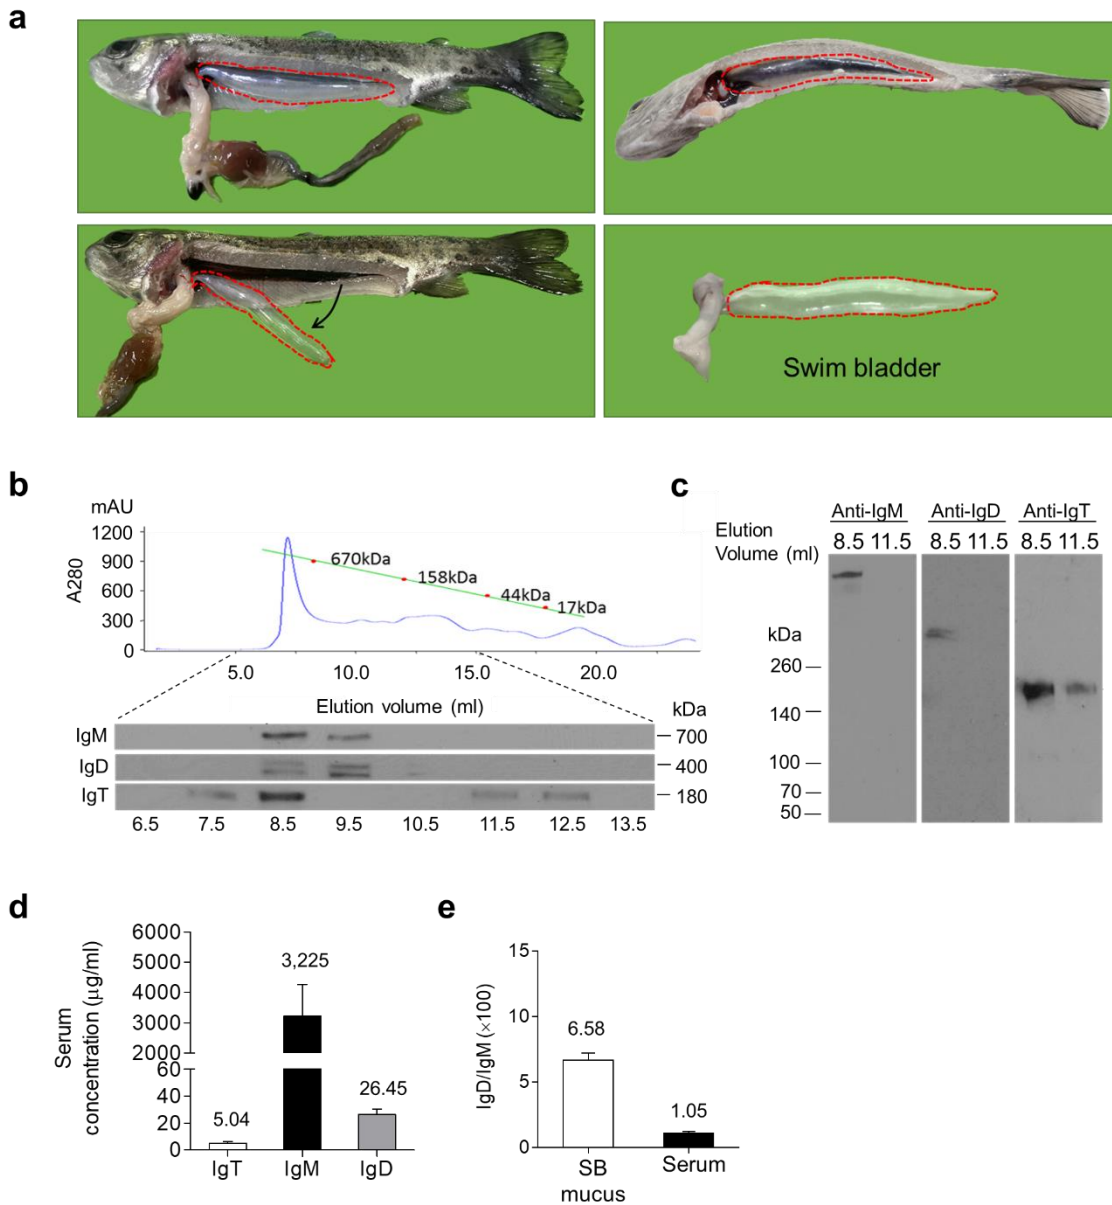

251

252 **Supplementary Fig. S1 The gross anatomy and location of SB in trout, and the protein**  
 253 **characterization of SB mucus Igs. a** Gross anatomy and location of SB in trout. **b** Fractionation  
 254 of SB mucus (~0.5 mL) by gel filtration (upper) followed by immunoblot analysis of the eluted  
 255 fractions (elution volumes 6.5-13.5 mL) with anti-trout IgM and anti-trout IgD mAbs or anti-  
 256 trout IgT antibody (lower). A<sub>280</sub>, absorbance at 280 nm. **c** SDS-PAGE (4-15%) of gel-filtration  
 257 fractions corresponding to eluent at elution volumes of 8.5 mL and 11.5 mL under non-reducing  
 258 conditions, followed by immunoblot analysis with anti-trout IgM and anti-trout IgD mAbs or

259 anti-trout IgT pAb. **d** Concentration of IgT, IgM, and IgD in serum ( $n = 13$ ). **e** Ratio of IgD to  
260 IgM concentration in SB mucus and serum ( $n = 13$ ).

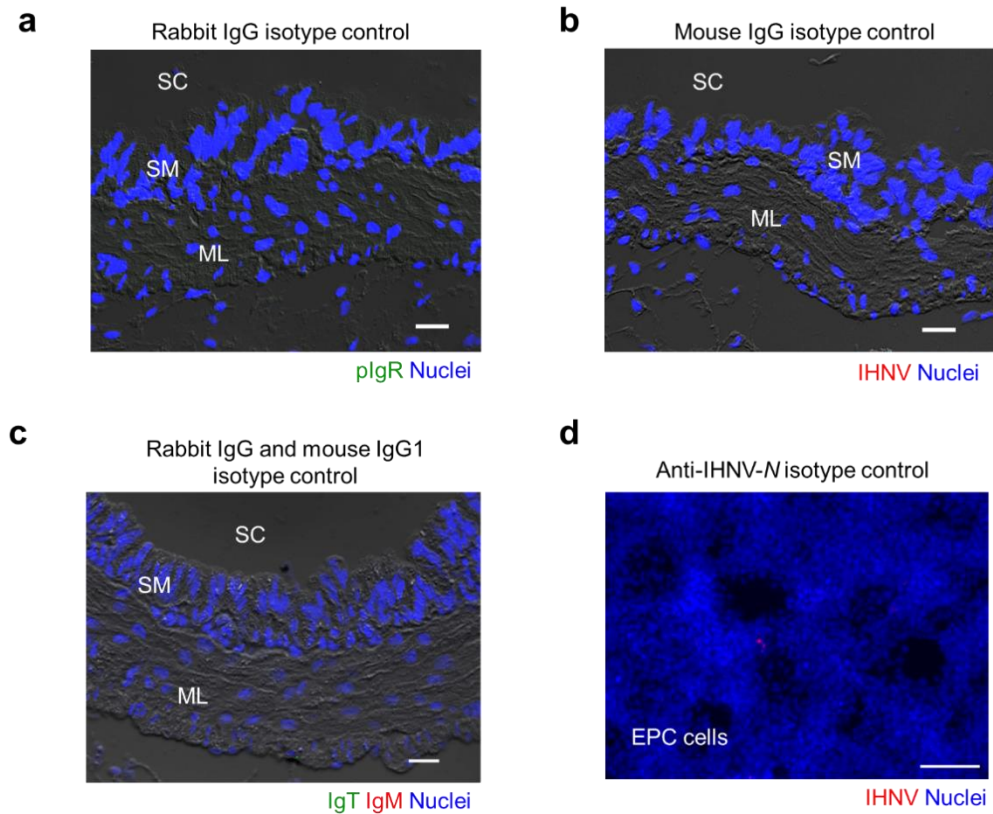

261  
 262 **Supplementary Fig. S2 Isotype control staining for anti-pIgR, anti-IHNV-N, anti-IgT and**  
 263 **anti-IgM, antibodies in trout SB paraffin sections, and isotype control staining for anti-**  
 264 **IHNV-N antibody in EPC cells. a-c** DIC images of SB paraffin-sections, with merged staining  
 265 of isotype control antibodies for anti-trout pIgR pAb (green, **a**), anti-IHNV-N mAb (magenta, **b**)  
 266 and anti-trout IgT pAb (green, **c**) and anti-trout IgM mAb (red, **c**). **d** IHNV infected EPC cells  
 267 merged staining of isotype control antibodies for anti-IHNV-N mAb (magenta, **d**). Nuclei were  
 268 stained with DAPI (blue) (**a-d**). SC, SB cavity; SM, SB mucosa; ML, muscle layer. Scale bars,  
 269 20 μm. Data are representative of three independent experiments.

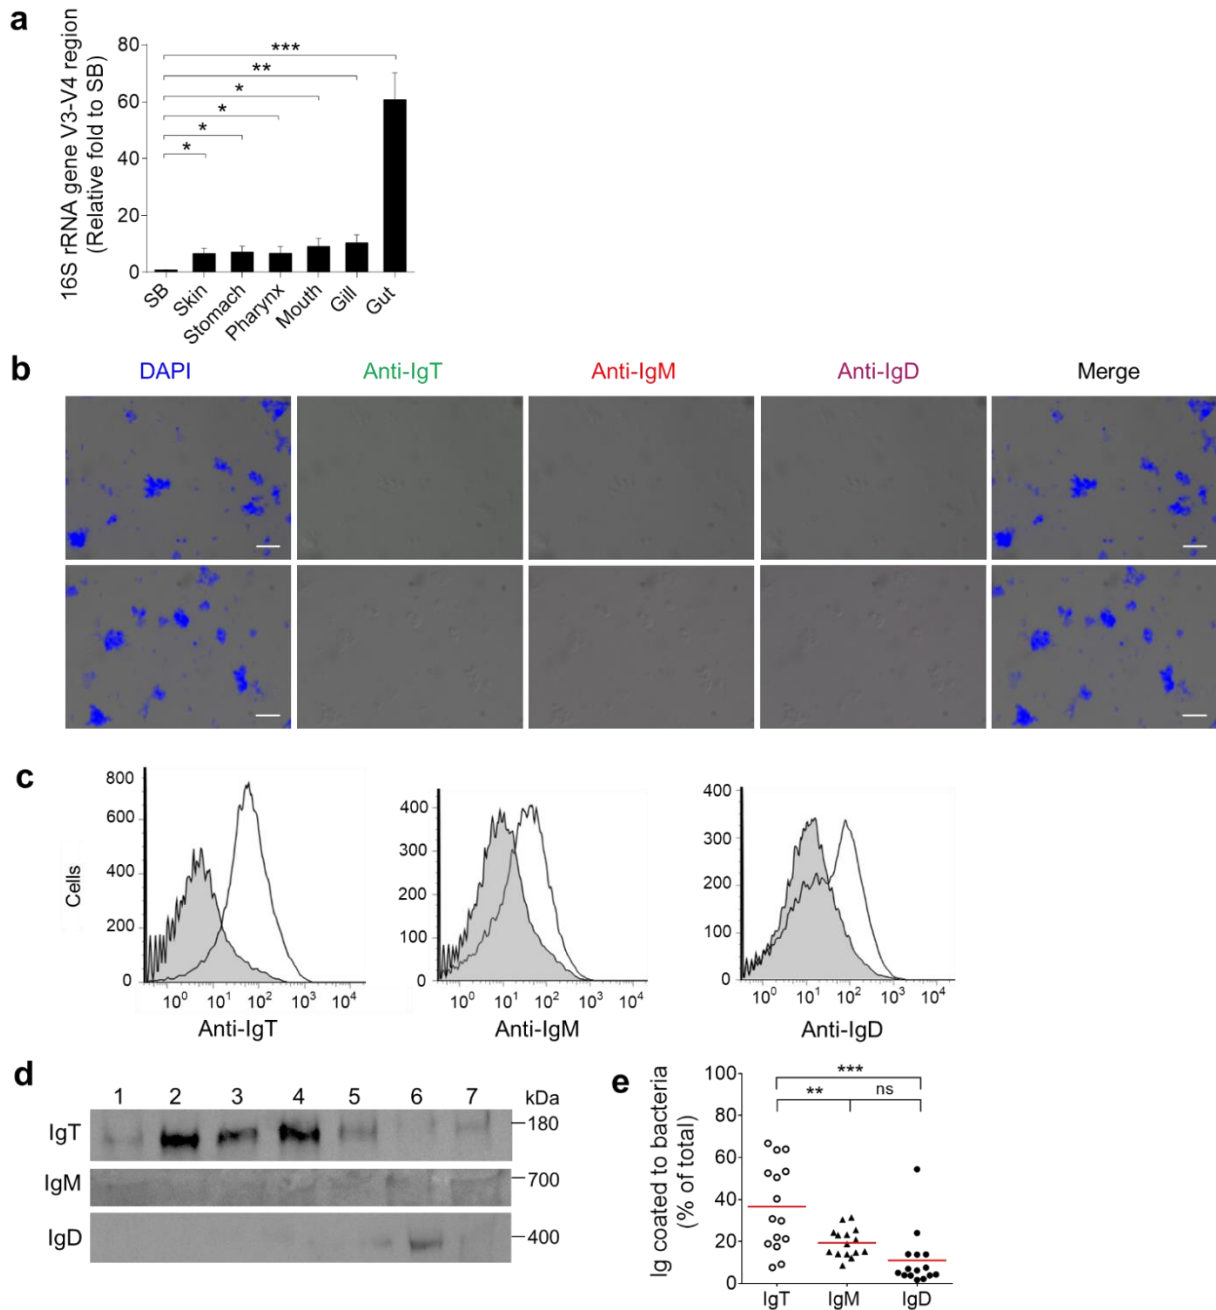

270

271 **Supplementary Fig. S3 Presence of microbiota in SB and analysis of their coating by trout**

272 **sIgs. a** Real-time PCR analysis of bacteria V3-V4 16S rRNA region in different trout mucosal

273 tissues (SB, skin, stomach, pharynx, mouth, gill, and gut). DNA abundance was normalized to

274 that of SB, which is set as 1 ( $n = 6$ ). **b** Differential interference contrast of SB bacteria with

275 isotype control antibodies for anti-trout IgT (green), anti-trout IgM (red), or anti-trout IgD

276 (magenta) mAbs. Nuclei were stained with DAPI (blue). Scale bars, 5  $\mu$ m. Upper and lower

277 panels display two different samples representative of at least three independent experiments. **c**

278 Representative flow cytometry histograms showing the staining of SB bacteria with anti-trout  
279 IgT, IgM, and IgD mAbs. Bacteria were stained also with isotype control antibodies for anti-  
280 trout IgT, anti-trout IgM, or anti-trout IgD mAbs, respectively (shaded histograms). **d**  
281 Immunoblot analysis of IgT, IgM, and IgD on SB bacteria ( $n = 7$ ). **e** Percentage of total SB  
282 mucus IgT, IgM, or IgD coating the SB bacteria ( $n = 15$ ). The median value is shown by a red  
283 line. Statistical differences were evaluated by unpaired Student's *t*-test (**a**) and one-way ANOVA  
284 with Bonferroni correction (**e**). Data in **a** and **e** are representative of at least three independent  
285 experiments (mean  $\pm$  SEM). \* $P < 0.05$ , \*\* $P < 0.01$ , and \*\*\* $P < 0.001$ .

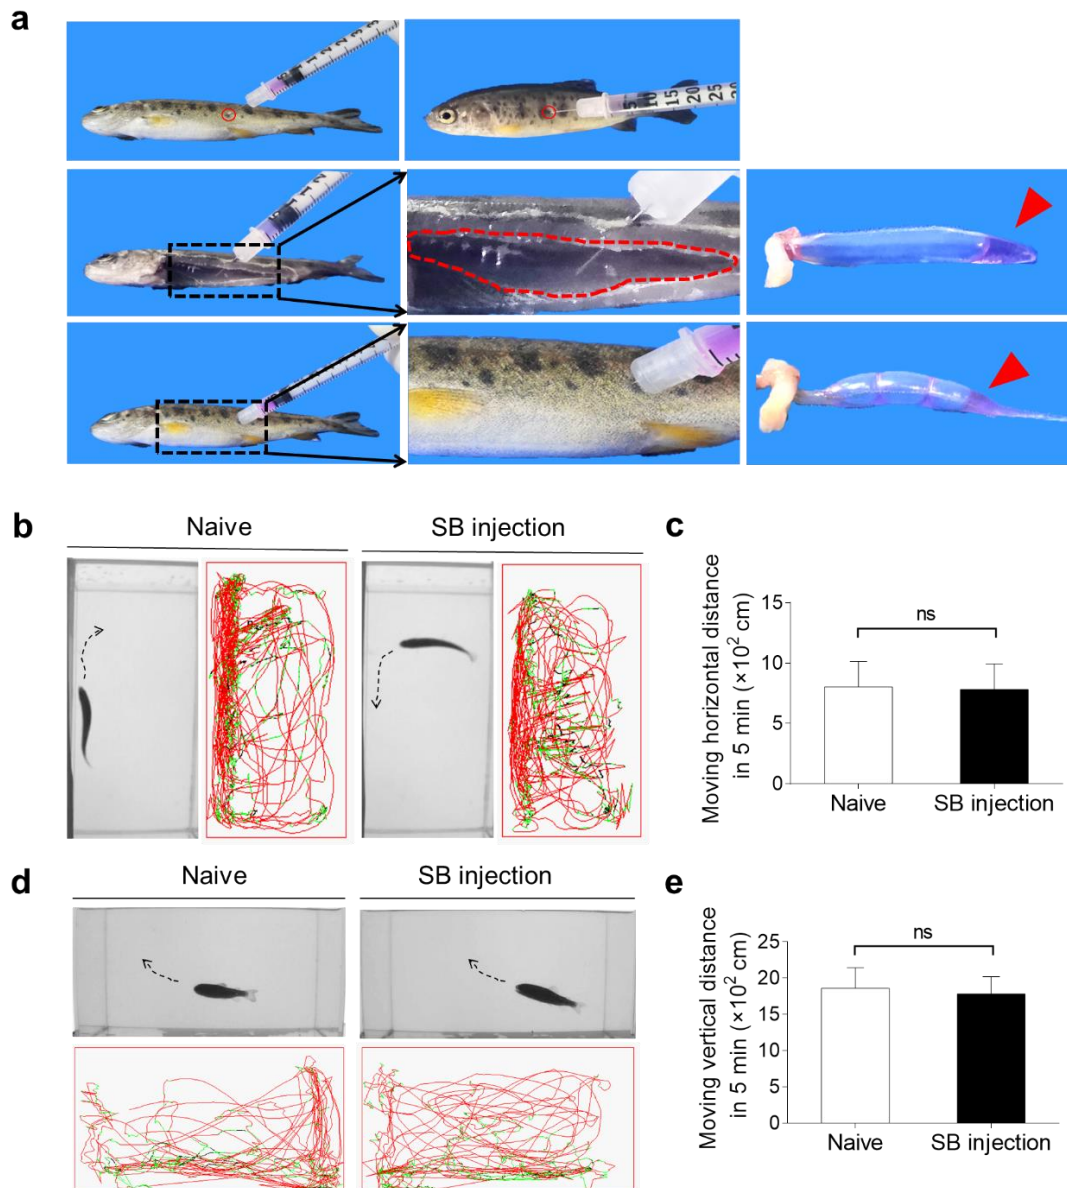

286

287 **Supplementary Fig. S4 Delivery of medium solution into SB lumen does not affect**  
 288 **swimming behavior of SB-injected fish.** **a** DMEM is effectively delivered into the SB without  
 289 affecting the air volume of the SB. The empty red circles represent the injection position; the red  
 290 dashed line shows the SB containing the syringe needle; the red arrow represents DMEM  
 291 delivered into the SB. **b** Horizontal locomotor trajectory over a 5 min period of trout with or  
 292 without SB injection with DMEM. The movement velocities  $>4.5 \text{ cm s}^{-1}$  and  $<2.5 \text{ cm s}^{-1}$  are  
 293 presented by red and gray locomotor trajectories respectively while the movement velocity  
 294 between  $2.5 \text{ cm s}^{-1}$  and  $4.5 \text{ cm s}^{-1}$  is represented by a green locomotor trajectory. **c** Total  
 295 horizontal distance moved over 5 min by trout with and without SB injection ( $n = 11-12$ ). **d**

296 Vertical locomotor trajectory of trout with and without SB injection with DMEM over a 5 min  
297 period. **e** Total horizontal distance moved over 5 min by trout with or without SB injection ( $n =$   
298 4-5). Statistical analysis was performed by unpaired Student's  $t$ -test (**c** and **e**). Data in **c** and **e** are  
299 representative of at least three independent experiments (mean  $\pm$  SEM). ns, no significance.



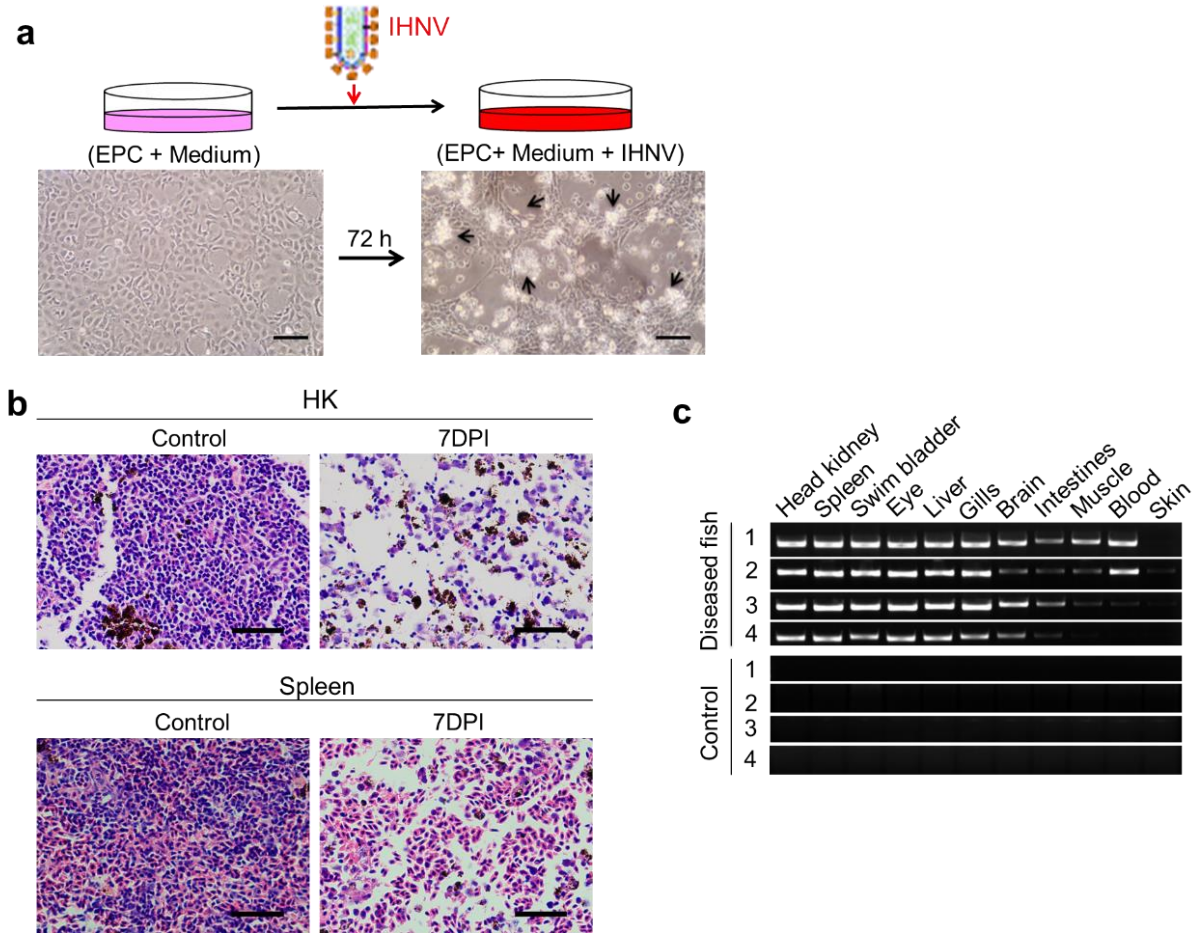

300

301 **Supplementary Fig. S5 Cytopathic effects of IHNV in EPC cells, HK and spleen, and IHNV**

302 **load in different organs of infected trout. a** Cytopathic effect shown in the EPC cells at 72 h

303 after IHNV infection (small black arrows show cytopathic lesions). Scale bars, 50  $\mu$ m. **b** H & E

304 staining of HK and spleen paraffin-sections in control (left) and infected (right) fish after 7 DPI

305 with IHNV (25  $\mu$ L,  $1 \times 10^5$  TCID<sub>50</sub>). Scale bars, 50  $\mu$ m. **c** IHNV-*G* gene (693 bp) expression

306 profiles by reverse transcription PCR in different tissues from control and diseased trout,

307 respectively.

308

309

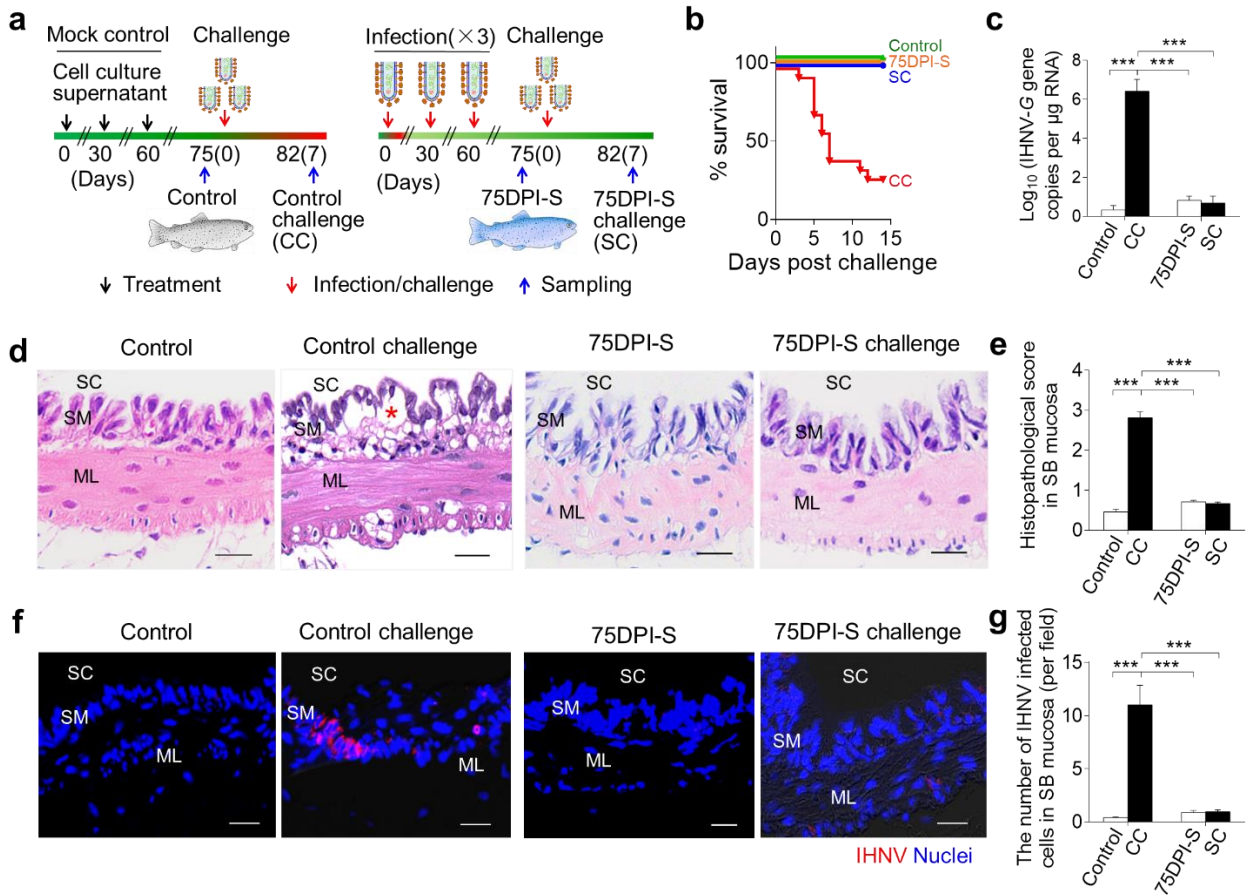

310  
 311 **Supplementary Fig. S6 Survivor fish previously infected with IHNV become resistant to**  
 312 **infection upon re-challenge with a high dose of the virus. a** Strategy to obtain the different  
 313 groups of control and survivor fish. Control fish were obtained after three monthly SB injections  
 314 with EPC cells culture supernatant. At 75 days after the first injection, fish were challenged with  
 315 the virus (25  $\mu$ L,  $1 \times 10^6$  TCID<sub>50</sub>), and 7 days post-challenge fish (control challenge or CC group)  
 316 were sacrificed for sampling. To generate 75 DPI survivor fish (75DPI-S group), fish were  
 317 injected monthly with a viral preparation (25  $\mu$ L,  $1 \times 10^5$  TCID<sub>50</sub>), and at 75 days after the first  
 318 injection, fish were challenged with IHNV (25  $\mu$ L,  $1 \times 10^6$  TCID<sub>50</sub>), and 7 days post-challenge  
 319 fish (75DPI-S challenge or SC group) were sacrificed for sampling. **b** Percentage survival of  
 320 control, CC, 75DPI-S and SC fish groups. **c** The IHNV-G gene expression in SB of control, CC,  
 321 75DPI-S and SC fish groups were quantified using qPCR. **d** Histological examination by H & E  
 322 staining of SB from control, CC, 75DPI-S and SC fish ( $n = 7-9$ ). Red asterisk indicates tissue  
 323 damage in epithelium layer of SB. SC, SB cavity; SM, SB mucosa; ML, muscle layer. Scale bars,  
 324 20  $\mu$ m. **e** Pathology score of SB tissue from control, CC, 75DPI-S and SC fish were evaluated on

325 SB tissue sections stained with H & E. **f** Viral particles were detected with the anti-IHNV-*N*  
326 protein mAb (red) in SB mucosa from control, CC, 75DPI-S and SC fish ( $n = 8-12$ ). SC, SB  
327 cavity; SM, SB mucosa; ML, muscle layer. Scale bars, 20  $\mu\text{m}$ . **g** The number of virally stained  
328 cells in SB mucosa from control, CC, 75DPI-S and SC fish counted from **f** ( $n = 8-12$ ). Statistical  
329 analysis was performed by unpaired Student's *t*-test (**c**, **e**, **g**). Data are representative of at least  
330 three independent experiments (mean  $\pm$  SEM). \*\*\* $P < 0.001$ .  
331

332

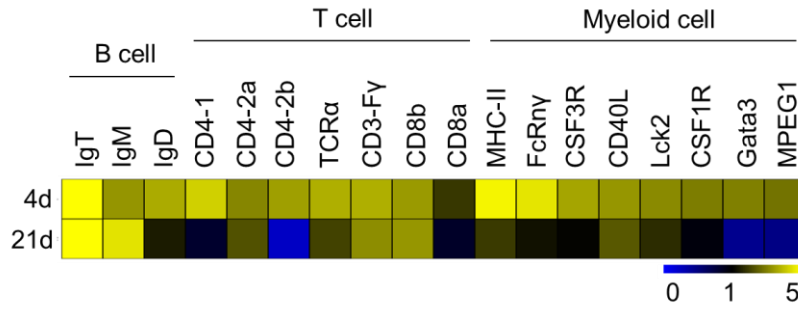

333

334 **Supplementary Fig. S7 Increases in the mRNA expression levels of B cell, T cell and**  
335 **myeloid markers in trout SB upon infection with IHNV.** Heat map illustrates results from  
336 quantitative real-time PCR of transcripts for selected immune markers from SB of IHNV-  
337 infected versus control fish measured at 4 and 21 DPI ( $n = 6$ ). Data are expressed as mean fold  
338 increase in expression. Color value:  $\log_2$  (fold change).

339

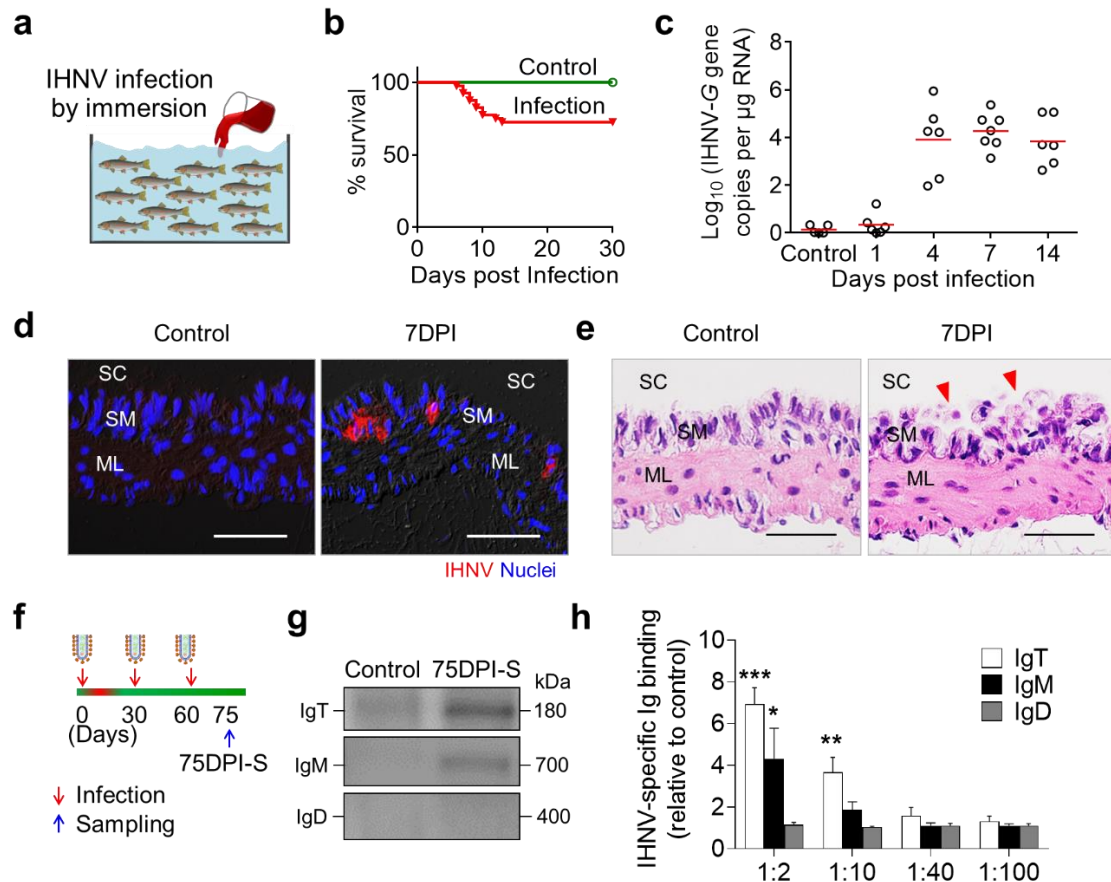

340  
 341 **Supplementary Fig. S8 The Ig response of trout SB following infection by immersion with**  
 342 **IHNV.** **a** Trout were infected by immersion with a dose of IHNV ( $2 \times 10^4$  TCID<sub>50</sub> per mL of  
 343 water), and treated with medium as control. **b** Cumulative survival of control and IHNV-infected  
 344 fish ( $n = 40$  per group). **c** IHNV-*G* gene copies ( $\text{Log}_{10}$ ) were quantified using qPCR in fish  
 345 tissues collected at 1, 4, 7, and 14 DPI ( $n = 6$ ). The median value is shown by a red line. **d**  
 346 Immunofluorescence staining of IHNV in SB paraffin-sections from control and 7 days infected  
 347 fish ( $n = 6$ ). **e** Histological examination (H & E) of SB from control fish and 7 days infected fish.  
 348 The red arrow represents the damage of SB epitheliums upon IHNV infection. **f** fish were  
 349 infected by immersion with the same dose of IHNV. The surviving fish were reinfected twice at  
 350 30 and 60 DPI with the same strategy, and the resulting surviving fish were sacrificed at 75 days  
 351 after the first infection (75DPI-S group). **g** Western blot analysis of IgT-, IgM- and IgD-specific  
 352 binding to IHNV in SB mucus (dilution 1/2) from 75DPI-S fish comparted with the control. **h**  
 353 IgT-, IgM- and IgD-specific binding to IHNV in dilutions of SB mucus from 75DPI-S fish

354 evaluated by densitometric analysis of immunoblots and presented as relative values to those of  
355 control fish ( $n = 6$ ).

356

357

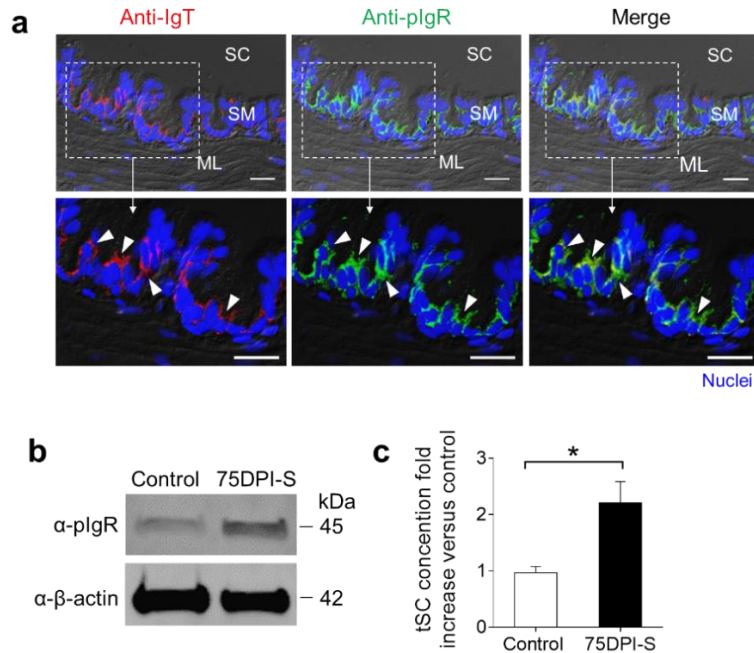

358

359 **Supplementary Fig. S9 Trout pIgR associates with sIgT in SB mucosa and pIgR levels are**

360 **increased in 75DPI-S fish. a** Immunofluorescence staining for pIgR and IgT in SB mucosa of

361 75DPI-S trout. Differential interference contrast (DIC) images of SB mucosa stained with anti-

362 trout IgT (red), anti-trout pIgR (green), and DAPI for nuclei (blue) ( $n = 6$ ). Enlarged sections (**a**,

363 lower panels) of the areas outlined in **a** (upper panels) showing pIgR/IgT colocalization (white

364 arrowheads). Scale bars, 20  $\mu$ m. SC, SB cavity; SM, SB mucosa; ML, muscle layer. **b**

365 Representative immunoblot analysis of trout secretory component (tSC) of pIgR (upper panels)

366 in SB mucus from control fish and 75DPI-S fish. **c** Data in B were quantified by densitometry ( $n$

367 = 5-7). Statistical difference in **c** was evaluated by unpaired Student's  $t$ -test. Data are

368 representative of at least three independent experiments. \* $P < 0.05$ .

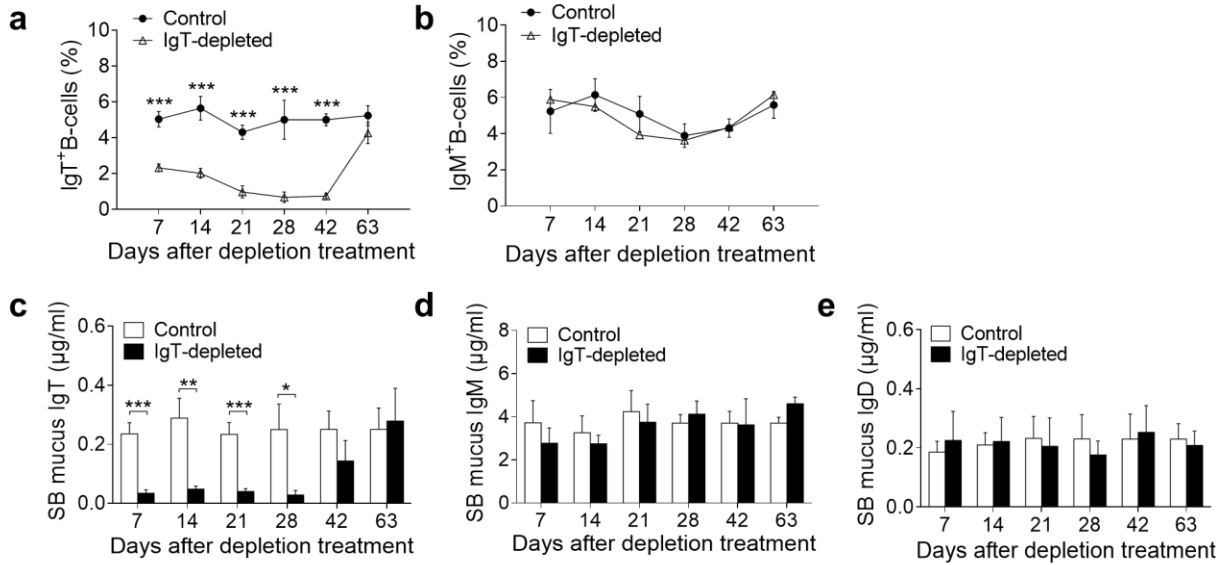

369

370

371 **Supplementary Fig. S10 Effect of IgT<sup>+</sup> B-cell depletion treatment on B-cells and sIgs in**

372 **trout SB. a, b** The percentage of IgT<sup>+</sup> (a) and IgM<sup>+</sup> (b) B-cells from SB leukocytes in control

373 (non-depleted) and IgT<sup>+</sup> B-cell-depleted fish ( $n = 7-9$ ). **c-e** Concentration of IgT (c), IgM (d),

374 and IgD (e) in SB mucus of control and IgT<sup>+</sup> B-cell-depleted fish ( $n = 6$ ). Data are representative

375 of at least three independent experiments (mean  $\pm$  SEM). Statistical differences were evaluated

376 by unpaired Student's *t*-test. Data are representative of three independent experiments (mean  $\pm$

377 SEM). \* $P < 0.05$ , \*\* $P < 0.01$ , and \*\*\* $P < 0.001$ .

378



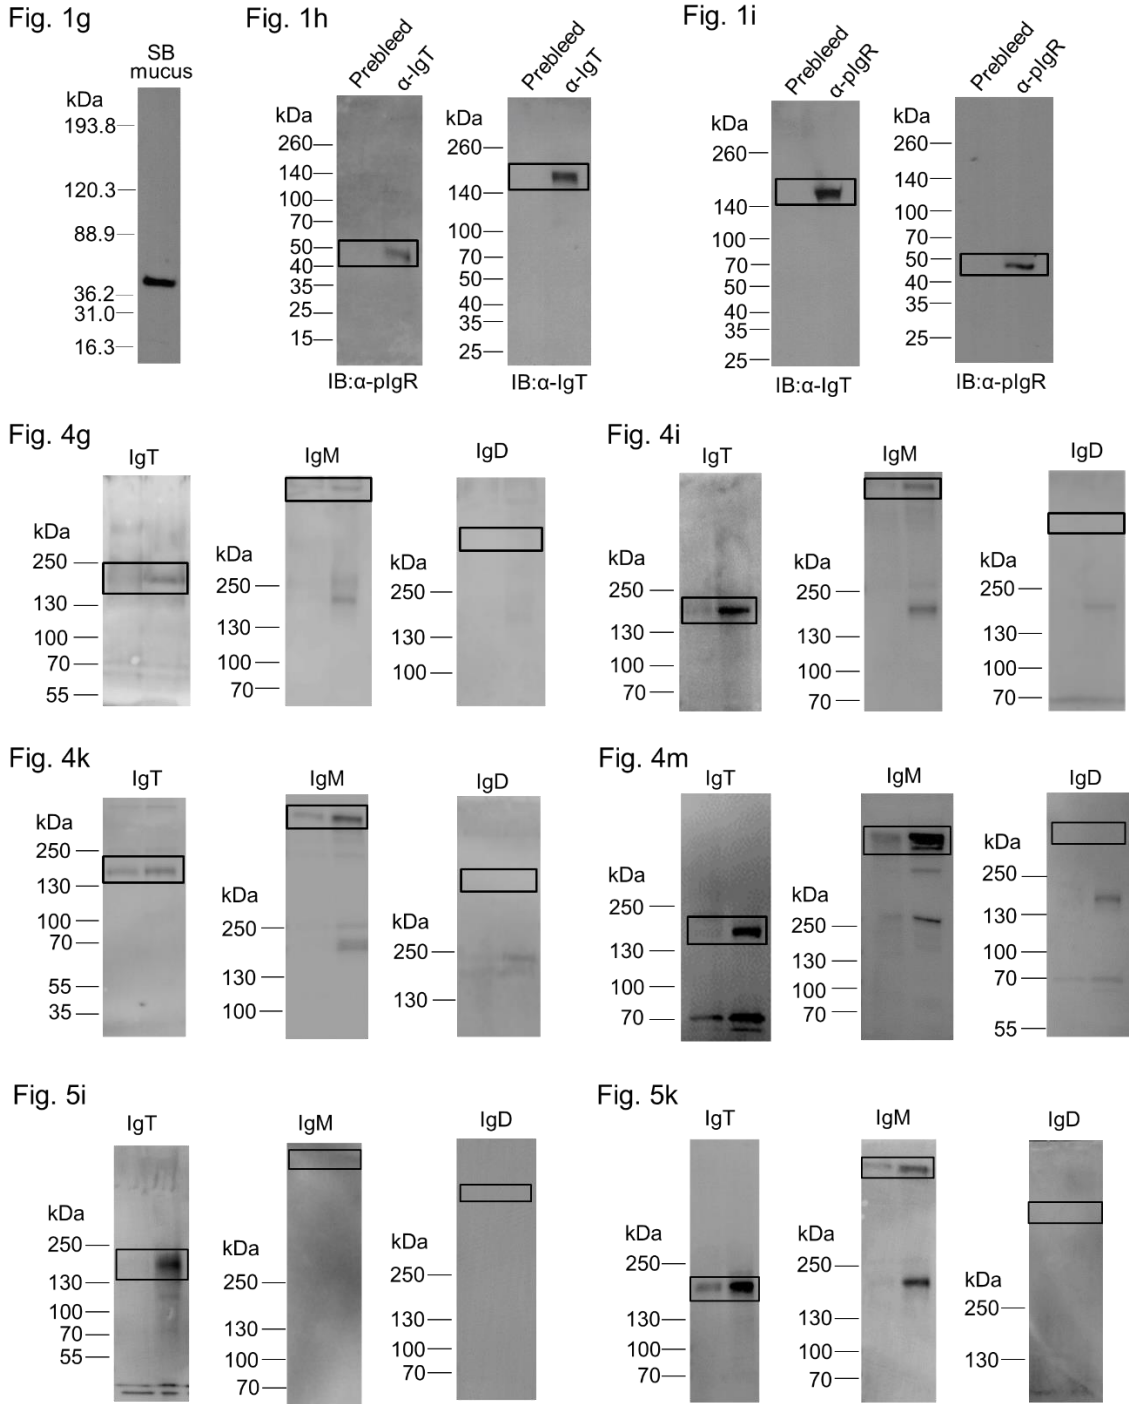

379

380 **Supplementary Fig. S11 Original images of the western blot analyses in the main figures.**

381

Fig. 6c

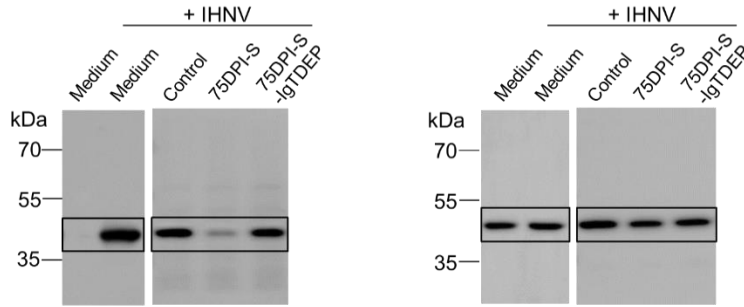

Supplementary Fig. S1b

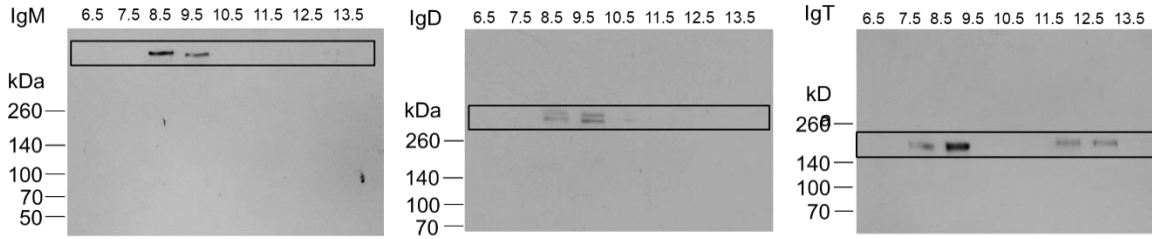

Supplementary Fig. S1c

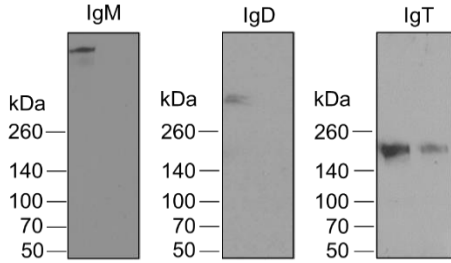

Supplementary Fig. S3d

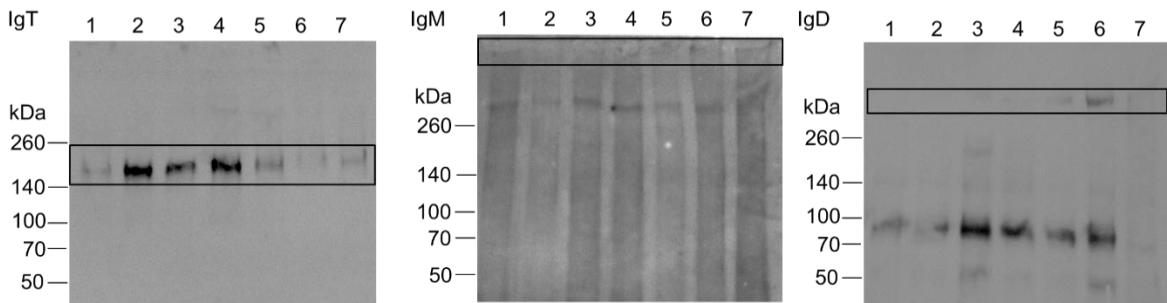

Supplementary Fig. S8g

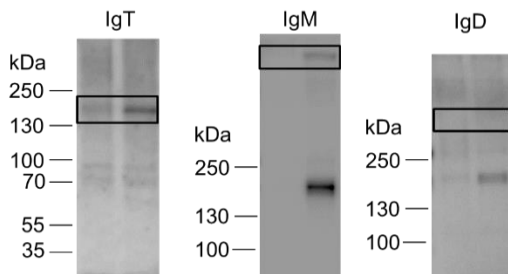

Supplementary Fig. S9b

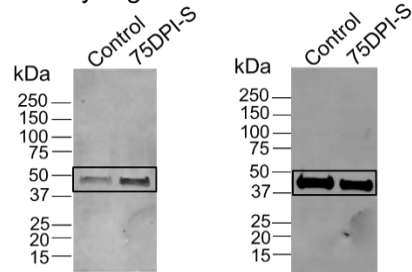

382

383 **Supplementary Fig. S11 Continued**

384

385 **Supplementary Table. S1 Primers used in this study.**

| Gene           | Primer Sequence (5' -> 3')       |                             |
|----------------|----------------------------------|-----------------------------|
|                | Forward primer                   | Reverse primer              |
| RIG-I          | CAGAGGTTACTACAGGAAATGG           | TTACTGGTCTTCAAGCAATG        |
| IRF7           | GATGCCTCAAATGAAATGG              | TCAGGGAACTTCTCACCAAA        |
| Mx1            | GATGCTGCACCTCAAGTCCTACTA         | CGGATCACCATGGGAATCTGA       |
| CD80           | ACACCGTTGTGAAAACCTCCA            | TCGTGCCCAATACAATAGAA        |
| ITAC           | GCCAGGTGGGTCAATTCTAAA            | TTCTTCCCTTCTCCGTTCTT        |
| CD2            | GGCAACCACGACTGGGACT              | TGGCGTCTTTGAAGGTTTATT       |
| IgT            | CAGACAACAGCACCTCACCTA            | GAGTCAATAAGAAGACACAACGA     |
| IgM            | AAGAAAGCCTACAAGAGGGAGA           | CGTCAACAAGCCAAGCCACTA       |
| IgD            | CAGGAGGAAAGTTCGGCATCA            | CCTCAAGGAGCTCTGGTTTGG       |
| PI3K           | GAATAAGCACGAGGATGTA              | CAGAAAAGTAGCAAGGTCA         |
| CD4L           | TTGACCTGGTAGCAAAAAGC             | TGAATGTGACTGTGATGGG         |
| CXCL9          | GTGGTTTTGCTGGGAGTTT              | TTTTGCTTGTTCGTCCTTGT        |
| CXCL11         | CCAGGTGGGTCAATTCTAAA             | CACTTCTTCCCTTCTCCGT         |
| LGP2           | AGTTTGGCACGCAGGAGTA              | CAAGCAGGAAGAAGTCGGT         |
| MDA5           | CAGTGGAGATGACGATGGG              | ACTTGGCGTTCTTGTGCTT         |
| CD4-1          | TGGTCGAGAGACGATAGATCC            | GAGGTAAGTGTGTTGTGGCATGA     |
| CD4-2a         | CGTGAGAAGTTTGTGCGGAA             | TGGCTGCCTTTGGTACAGTGA       |
| CD4-2b         | AAGCCCCTCTTGCCGAGGAA             | CTCAACGCCTTTGGTACAGTGA      |
| TCR- $\alpha$  | CAGCTTGAAGTCAAGAAATAC            | TATCAGCACGTTGAAAACGAT       |
| CD3-F $\gamma$ | GAACACTGGAATACAAGGACGAGAAC<br>AC | GAGCCCCATTTTGCTAGATGTTTTCTT |
| CD8a           | ACTGCCAAGTCGTGCAAAGTG            | AAGCCACAGCCAGCAGTCAA        |
| CD8b           | TCCTGTATGCTCCAGAACCAG            | ATGTTGGGCGAGTTTCTCCG        |
| MHC-II         | GGTGAGTTTGTGATGATAC              | AGCGTTAGGCTTACATAGA         |
| FcR $\gamma$   | TACTCCAACCTCCATCTACTC            | CTGTGGATAACCCGCCAGTGA       |
| CSF3R          | TCCACGGGACAGAGTACCACA            | GAAACTGCTTCGATGGCTTCC       |
| CD40L          | CAAGCAACCTGTCTGTTGGTG            | GTACACACGTCGTCCGGTT         |
| Lck2           | CCTGTTGAAGAGCATTATATTAG          | ACGGTTTAGCCGACTGGGTG        |
| CSF1R          | ATCTCCACTCATGGCGACACA            | CATCGCACTGGGTTTCTGGTA       |
| Gata3          | CCAAAAACAAGGTCATGTTTCCAGAAGG     | TGGTGAGAGGTCGGTTGATATTGTG   |
| MPEG1          | CTCAGACGTGTCCTTCTCTC             | CGTGTATAAGAAGTTACGCACTTG    |
| EF-1a          | CAACGATATCCGTCGTGGCA             | CAACGATATCCGTCGTGGCA        |
| IHNV-N         | TTAACTTCAACGCCAACAGG             | TCGGACAGGTTGATGAGAATG       |
| IHNV-G         | CACGGAAACAACACCACCATTA           | AACAGCAAGGAGGAGAACAAGG      |
| IHNV-G (693)   | AGAGATCCCTACACCAGAGAC            | GGTGGTGTGTTTCCGTGCAA        |
| 16S V3-V4      | ACTCCTACGGGAGGCAGCA              | GGACTACHVGGGTWTCTAAT        |

387 **Supplementary Video. S1 Swimming video of rainbow trout after SB injection with DMEM.**

388 Sixteen rainbow trout (~5g) were randomly divided into two groups. One group of fish were SB  
389 injected with 50  $\mu$ L DMEM (SB injection group), while the other fish group where not injected  
390 (naïve fish group). After injection, both groups were held in two different 28 L glass tanks (40  
391 cm  $\times$  20 cm  $\times$  35 cm) at 16 °C for 1 day, respectively. Thereafter, each group fish were imaged  
392 for a 1 h period using a Canon 750D video camera.
